# Supplementary material for: Homogenization of Urban Forests across the Subtropical Zones of China
Source: MDPI journal article supplement (doi:10.3390/land12081559), 2023-08-06
Supplement: s1 [file s1]

Archive with 1 entries (1 files):
- land-2519842-supplementary.pdf
