# Supplementary material for: Homogenization of Urban Forests across the Subtropical Zones of China
Source: MDPI journal article supplement (doi:10.3390/land12081559), 2023-08-06
Supplement: s1 [file s1 › land-2519842-supplementary.pdf]

# **Supplementary Materials for**

## **Homogenization of urban forests across the subtropical zones of China**

This PDF file includes:

Figures S1 to S3

Tables S1 to S4

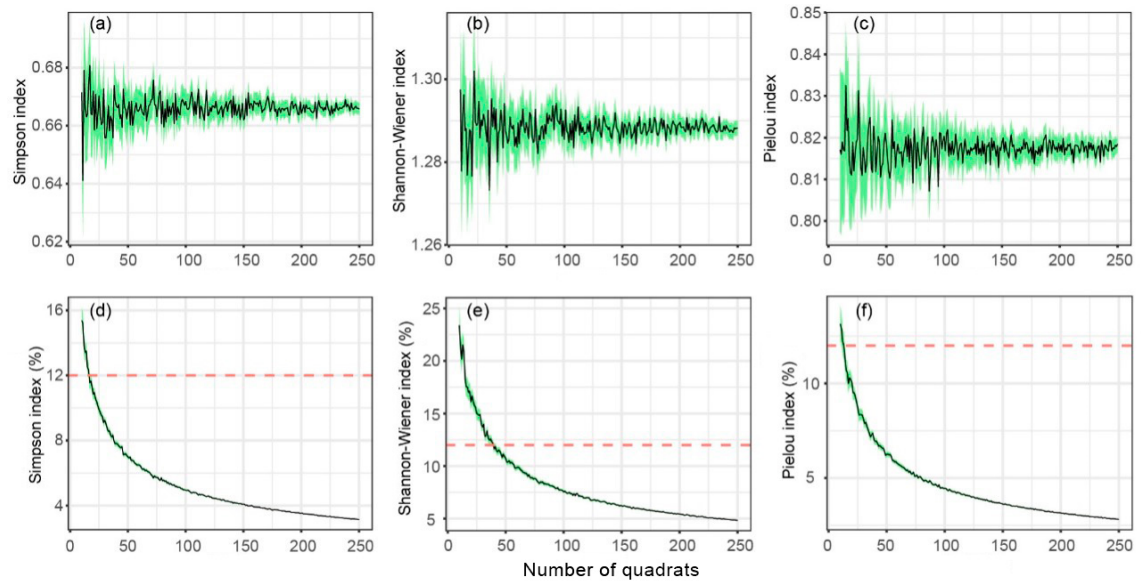

Figure S1. Estimated value and relative standard deviation of tree species diversity of green space quadrats in Guangzhou. (a) Simpson index, (b) Shannon-Wiener index, (c) Pielou index. The black line is the average estimate, and the green area is the 95% confidence interval of the average estimate. The relative standard deviation of the Simpson index (d), Shannon-Wiener index (e), Pielou index (f). The black line is the average relative standard error, the green area is the 95% confidence interval of the average relative standard error, and the red dotted line represents the 12% relative standard error.

| Changzhou | Wuxi | Suzhou | Shanghai | Ningbo | Hangzhou | Taizhou | Fuzhou | Ganzhou | Wuhan | Changsha | Ankang | Chengdu | Chongqing | Kunming | Guangzhou | Nanning | Lhasa |           |
|-----------|------|--------|----------|--------|----------|---------|--------|---------|-------|----------|--------|---------|-----------|---------|-----------|---------|-------|-----------|
| 0.33      | 0.41 | 0.38   | 0.32     | 0.34   | 0.52     | 0.32    | 0.19   | 0.31    | 0.35  | 0.30     | 0.30   | 0.26    | 0.22      | 0.21    | 0.14      | 0.11    | 0.11  | Nanjing   |
|           | 0.37 | 0.44   | 0.41     | 0.37   | 0.33     | 0.37    | 0.19   | 0.34    | 0.32  | 0.41     | 0.39   | 0.33    | 0.28      | 0.24    | 0.15      | 0.13    | 0.17  | Changzhou |
|           |      | 0.45   | 0.39     | 0.35   | 0.41     | 0.35    | 0.20   | 0.35    | 0.37  | 0.38     | 0.32   | 0.31    | 0.28      | 0.23    | 0.14      | 0.12    | 0.14  | Wuxi      |
|           |      |        | 0.46     | 0.40   | 0.40     | 0.42    | 0.20   | 0.34    | 0.43  | 0.42     | 0.37   | 0.36    | 0.28      | 0.24    | 0.15      | 0.13    | 0.17  | Suzhou    |
|           |      |        |          | 0.38   | 0.34     | 0.34    | 0.21   | 0.36    | 0.38  | 0.40     | 0.32   | 0.34    | 0.27      | 0.24    | 0.15      | 0.13    | 0.15  | Shanghai  |
|           |      |        |          |        | 0.33     | 0.40    | 0.22   | 0.37    | 0.30  | 0.40     | 0.32   | 0.30    | 0.27      | 0.19    | 0.16      | 0.14    | 0.12  | Ningbo    |
|           |      |        |          |        |          | 0.33    | 0.20   | 0.31    | 0.36  | 0.31     | 0.28   | 0.26    | 0.23      | 0.21    | 0.15      | 0.14    | 0.10  | Hangzhou  |
|           |      |        |          |        |          |         | 0.21   | 0.38    | 0.33  | 0.35     | 0.37   | 0.33    | 0.27      | 0.24    | 0.18      | 0.14    | 0.13  | Taizhou   |
|           |      |        |          |        |          |         |        | 0.29    | 0.19  | 0.23     | 0.22   | 0.28    | 0.29      | 0.22    | 0.36      | 0.29    | 0.10  | Fuzhou    |
|           |      |        |          |        |          |         |        |         | 0.31  | 0.40     | 0.41   | 0.46    | 0.37      | 0.32    | 0.23      | 0.17    | 0.14  | Ganzhou   |
|           |      |        |          |        |          |         |        |         |       | 0.34     | 0.32   | 0.29    | 0.24      | 0.20    | 0.17      | 0.14    | 0.15  | Wuhan     |
|           |      |        |          |        |          |         |        |         |       |          | 0.36   | 0.35    | 0.31      | 0.22    | 0.17      | 0.15    | 0.18  | Changsha  |
|           |      |        |          |        |          |         |        |         |       |          |        | 0.38    | 0.30      | 0.27    | 0.18      | 0.13    | 0.17  | Ankang    |
|           |      |        |          |        |          |         |        |         |       |          |        |         | 0.37      | 0.34    | 0.22      | 0.17    | 0.18  | Chengdu   |
|           |      |        |          |        |          |         |        |         |       |          |        |         |           | 0.26    | 0.21      | 0.18    | 0.13  | Chongqing |
|           |      |        |          |        |          |         |        |         |       |          |        |         |           |         | 0.18      | 0.15    | 0.13  | Kunming   |
|           |      |        |          |        |          |         |        |         |       |          |        |         |           |         |           | 0.36    | 0.06  | Guangzhou |
|           |      |        |          |        |          |         |        |         |       |          |        |         |           |         |           |         | 0.03  | Nanning   |

Figure S2. Jaccard similarity index between urban forests for pairs of cities.

| Region2 | Region3 | Region4 | Region5 | Region6 |         |
|---------|---------|---------|---------|---------|---------|
| 0.23    | 0.36    | 0.19    | 0.17    | 0.00    | Region1 |
|         | 0.27    | 0.15    | 0.24    | 0.00    | Region2 |
|         |         | 0.26    | 0.20    | 0.00    | Region3 |
|         |         |         | 0.15    | 0.00    | Region4 |
|         |         |         |         | 0.00    | Region5 |

Figure S3. Jaccard similarity index between urban forests for pairs of natural regions.

Table S1. Summary of socio-economic characteristics and climatic conditions of 19 case cities on the precipitation gradient from east to west in the subtropical zone of China

| City      | Population<br>(million) | Built-up area<br>(km <sup>2</sup> ) | GDP<br>(Billion Yuan) | Per capita GDP<br>(Thousand<br>Yuan) | Precipitation<br>(mm) |
|-----------|-------------------------|-------------------------------------|-----------------------|--------------------------------------|-----------------------|
| Guangzhou | 12.70                   | 1237                                | 1321                  | 136.2                                | 1852                  |
| Taizhou   | 5.97                    | 140                                 | 130                   | 64.3                                 | 1559                  |
| Nanning   | 6.66                    | 287                                 | 254                   | 69.9                                 | 1491                  |
| Ganzhou   | 8.38                    | 141                                 | 254                   | 40.8                                 | 1484                  |
| Fuzhou    | 7.12                    | 260                                 | 283                   | 92.0                                 | 1458                  |
| Changsha  | 7.04                    | 364                                 | 539                   | 137.0                                | 1424                  |
| Hangzhou  | 8.70                    | 506                                 | 872                   | 121.7                                | 1406                  |
| Ningbo    | 7.61                    | 322                                 | 488                   | 135.8                                | 1331                  |
| Wuhan     | 9.79                    | 455                                 | 881                   | 116.8                                | 1259                  |
| Shanghai  | 23.02                   | 999                                 | 2484                  | 105.7                                | 1155                  |
| Suzhou    | 10.46                   | 458                                 | 749                   | 136.6                                | 1149                  |
| Wuxi      | 6.37                    | 329                                 | 435                   | 120.3                                | 1123                  |
| Chongqing | 28.85                   | 1329                                | 793                   | 62.3                                 | 1115                  |
| Changzhou | 4.59                    | 250                                 | 454                   | 115.5                                | 1109                  |
| Nanjing   | 8.00                    | 755                                 | 972                   | 118.2                                | 1054                  |
| Chengdu   | 14.05                   | 616                                 | 846                   | 92.0                                 | 963                   |
| Kunming   | 6.43                    | 438                                 | 307                   | 77.6                                 | 937                   |
| Ankang    | 2.63                    | 45                                  | 23                    | 26.7                                 | 873                   |

Notes: The population data come from the sixth population census of China. The GDP, built-up area and per capita GDP data are from the China City Statistical Yearbook 2016. The annual mean temperature, precipitation and humidity data are from the Resource and Environmental Science Data Center of the Chinese Academy of Sciences, based on the average of 1951-2011.

Table S2. The number of transects and quadrats established in each case city.

| City      | Time of field investigation<br>(year.month) | Number of transects | Number of quadrats |                 |       |
|-----------|---------------------------------------------|---------------------|--------------------|-----------------|-------|
|           |                                             |                     | From field survey  | From literature | Total |
| Nanjing   | 2018.08                                     | 4                   | 54                 | 210             | 264   |
| Changzhou | 2017.08                                     | 4                   | 54                 | 50              | 104   |
| Wuxi      | 2018.08                                     | 4                   | 50                 | 75              | 125   |
| Suzhou    | 2018.08                                     | 4                   | 52                 | 26              | 78    |
| Shanghai  | 2019.08                                     | 4                   | 117                | 210             | 327   |
| Ningbo    | 2017.08                                     | 4                   | 52                 | 348             | 400   |
| Hangzhou  | 2017.08                                     | 4                   | 150                | 648             | 798   |
| Taizhou   | 2017.08                                     | 4                   | 50                 | 31              | 81    |
| Fuzhou    | 2019.08                                     | 4                   | 55                 | 374             | 429   |
| Ganzhou   | 2020.08                                     | 4                   | 50                 | 45              | 95    |
| Wuhan     | 2019.08                                     | 4                   | 50                 | 234             | 284   |
| Changsha  | 2020.08                                     | 4                   | 50                 | 188             | 238   |
| Ankang    | 2020.08                                     | 4                   | 50                 | 138             | 188   |
| Chengdu   | 2018.08                                     | 4                   | 55                 | 25              | 80    |
| Chongqing | 2017.08                                     | 4                   | 50                 | 407             | 457   |
| Kunming   | 2020.08                                     | 4                   | 50                 | 81              | 131   |
| Guangzhou | 2019.08                                     | 4                   | 102                | 214             | 316   |
| Nanning   | 2020.08                                     | 4                   | 50                 | 209             | 259   |
| Lhasa     | 2020.08                                     | 4                   | 50                 | 20              | 70    |

Table S3. Comparison between the number of tree species in green spaces of each city counted in this study and that counted based on the information provided by the government departments responsible for urban greening.

| City      | Statistics from this study |                                                                                                                                                                                                         | Statistics based on the information provided by the government department responsible for urban greening |        | Relative error (%) |
|-----------|----------------------------|---------------------------------------------------------------------------------------------------------------------------------------------------------------------------------------------------------|----------------------------------------------------------------------------------------------------------|--------|--------------------|
|           | Number of tree species     | Ways to obtain the tree species list                                                                                                                                                                    | Number of tree species                                                                                   | Source |                    |
| Nanjing   | 193                        | 1. Field survey<br>2. Literature<br>3. Official website of government department responsible for greening ( <a href="http://ylj.nanjing.gov.cn/">http://ylj.nanjing.gov.cn/</a> , accessed: 2020.9)     | 169                                                                                                      | [41]   | 12                 |
| Changzhou | 151                        | 1. Field survey<br>2. Literature<br>3. Official website of government department responsible for greening ( <a href="http://cgj.changzhou.gov.cn/">http://cgj.changzhou.gov.cn/</a> , accessed: 2020.9) | 153                                                                                                      | [42]   | 1                  |
| Wuxi      | 158                        | 1. Field survey<br>2. Literature<br>3. Official website of government department responsible for greening ( <a href="http://gyj.wuxi.gov.cn/">http://gyj.wuxi.gov.cn/</a> , accessed: 2020.9)           | 148                                                                                                      | [43]   | 6                  |
| Suzhou    | 190                        | 1. Field survey<br>2. Literature<br>3. Official website of government department responsible for greening ( <a href="http://ylj.suzhou.gov.cn/">http://ylj.suzhou.gov.cn/</a> , accessed: 2020.9)       | 183                                                                                                      | [44]   | 4                  |
| Shanghai  | 183                        | 1. Field survey<br>2. Literature<br>3. Official website of government department responsible for greening ( <a href="http://lhsr.sh.gov.cn/">http://lhsr.sh.gov.cn/</a> , accessed: 2020.9)             | 177                                                                                                      | [45]   | 3                  |

|          |     |                                                                                                                                                                                                                                                                  |     |      |    |
|----------|-----|------------------------------------------------------------------------------------------------------------------------------------------------------------------------------------------------------------------------------------------------------------------|-----|------|----|
| Ningbo   | 167 | 1. Field survey<br>2. Literature<br>3. Official website of government department responsible for greening<br>( <a href="http://zhzfj.ningbo.gov.cn/col/col1229101783/index.html">http://zhzfj.ningbo.gov.cn/col/col1229101783/index.html</a> , accessed: 2020.9) | 165 | [46] | 1  |
| Hangzhou | 235 | 1. Field survey<br>2. Literature<br>3. Official website of government department responsible for greening<br>( <a href="http://www.hangzhou.gov.cn/col/col809995/index.html">http://www.hangzhou.gov.cn/col/col809995/index.html</a> , accessed: 2020.9)         | 231 | [47] | 2  |
| Taizhou  | 150 | 1. Field survey<br>2. Literature<br>3. Official website of government department responsible for greening<br>( <a href="http://zjf.zjtz.gov.cn/">http://zjf.zjtz.gov.cn/</a> , accessed: 2020.9)                                                                 | 140 | [48] | 7  |
| Fuzhou   | 207 | 1. Field survey<br>2. Literature<br>3. Official website of government department responsible for greening<br>( <a href="http://ylj.fuzhou.gov.cn/">http://ylj.fuzhou.gov.cn/</a> , accessed: 2020.9)                                                             | 203 | [49] | 2  |
| Ganzhou  | 138 | 1. Field survey<br>2. Literature<br>3. Official website of government department responsible for greening<br>( <a href="http://cgj.ganzhou.gov.cn/">http://cgj.ganzhou.gov.cn/</a> , accessed: 2020.9)                                                           | 150 | [50] | 9  |
| Wuhan    | 294 | 1. Field survey<br>2. Literature<br>3. Official website of government department responsible for greening<br>( <a href="http://ylj.wuhan.gov.cn/">http://ylj.wuhan.gov.cn/</a> , accessed: 2020.9)                                                               | 292 | [51] | 1  |
| Changsha | 151 | 1. Field survey<br>2. Literature                                                                                                                                                                                                                                 | 131 | [52] | 13 |

|           |     |                                                                                                                                                                                                                  |     |      |   |
|-----------|-----|------------------------------------------------------------------------------------------------------------------------------------------------------------------------------------------------------------------|-----|------|---|
|           |     | 3. Official website of government department responsible for greening<br>( <a href="http://cgj.changsha.gov.cn/">http://cgj.changsha.gov.cn/</a> , accessed: 2020.9)                                             |     |      |   |
| Ankang    | 131 | 1. Field survey<br>2. Literature<br>3. Official website of government department responsible for greening<br>( <a href="https://zjj.ankang.gov.cn/">https://zjj.ankang.gov.cn/</a> , accessed: 2020.9)           | 122 | [53] | 7 |
| Chengdu   | 145 | 1. Field survey<br>2. Literature<br>3. Official website of government department responsible for greening<br>( <a href="http://cdbpw.chengdu.gov.cn/">http://cdbpw.chengdu.gov.cn/</a> , accessed: 2020.9)       | 134 | [54] | 8 |
| Chongqing | 157 | 1. Field survey<br>2. Literature<br>3. Official website of government department responsible for greening<br>( <a href="http://cgj.cq.gov.cn/cgyw/zqlh/">http://cgj.cq.gov.cn/cgyw/zqlh/</a> , accessed: 2020.9) | 145 | [55] | 8 |
| Kunming   | 146 | 1. Field survey<br>2. Literature<br>3. Official website of government department responsible for greening<br>( <a href="https://cgj.km.gov.cn/">https://cgj.km.gov.cn/</a> , accessed: 2020.9)                   | 149 | [56] | 2 |
| Guangzhou | 246 | 1. Field survey<br>2. Literature<br>3. Official website of government department responsible for greening<br>( <a href="http://lyylj.gz.gov.cn/">http://lyylj.gz.gov.cn/</a> , accessed: 2020.9)                 | 239 | [57] | 3 |
| Lhasa     | 99  | 1. Field survey<br>2. Literature<br>3. Official website of government department responsible for greening<br>( <a href="https://lycyj.lasa.gov.cn/">https://lycyj.lasa.gov.cn/</a> , accessed: 2020.9)           | 93  | [58] | 6 |

Notes: The data of tree species number in 5 cities (such as Xilinhot) counted based on the information provided by the government departments were from the official websites of the government departments responsible for greening or books written by them, and that in the remaining 13 cities (such as Beijing) were from the published paper. In those published papers, the authors clearly pointed out that the data were provided by the government departments responsible for greening. The calculation of relative error referred to previous study [59],

$$r(\%) = \frac{x - x_0}{x_0} \times 100$$

where,  $r$  is the relative error;  $x$  is the measured value, and it refers to the number of tree species in green spaces of each city collected by us;  $x_0$  is the true value, which is replaced by the number of tree species counted based on the information provided by the government departments.

Table S4. Commonly used greening tree species in different types of green spaces in 19 case cities

| Tree species                        | Park GSs | Production GSs | Protective GSs | Attached GSs |
|-------------------------------------|----------|----------------|----------------|--------------|
| <i>Lagerstroemia indica</i>         | √        | -              | √              | -            |
| <i>Salix babylonica</i>             | √        | -              | √              | √            |
| <i>Acer palmatum</i>                | √        | -              | √              | -            |
| <i>Celtis sinensis</i>              | √        | -              | √              | √            |
| <i>Camphora officinarum</i>         | √        | -              | √              | -            |
| <i>Elaeocarpus decipiens</i>        | √        | -              | √              | -            |
| <i>Eriobotrya japonica</i>          | -        | √              | -              | √            |
| <i>Koelreuteria paniculata</i>      | √        | √              | √              | √            |
| <i>Liriodendron chinense</i>        | √        | -              | √              | √            |
| <i>Metasequoia glyptostroboides</i> | √        | √              | -              | -            |
| <i>Platycladus orientalis</i>       | √        | √              | √              | -            |
| <i>Podocarpus macrophyllus</i>      | -        | √              | -              | √            |
| <i>Juniperus chinensis</i>          | √        | -              | √              | √            |
| <i>Taxodium distichum</i>           | √        | -              | √              | -            |
| <i>Trachycarpus fortunei</i>        | √        | √              | -              | √            |
| <i>Albizia julibrissin</i>          | √        | -              | √              | -            |
| <i>Prunus mume</i>                  | √        | -              | -              | √            |
| <i>Camptotheca acuminata</i>        | -        | -              | √              | √            |
| <i>Ginkgo biloba</i>                | √        | √              | √              | √            |
| <i>Magnolia grandiflora</i>         | √        | √              | -              | √            |
| <i>Yulania liliiflora</i>           | √        | -              | -              | √            |
| <i>Morella rubra</i>                | -        | √              | -              | √            |
| <i>Osmanthus fragrans</i>           | √        | √              | √              | √            |
| <i>Triadica sebifera</i>            | √        | -              | √              | √            |
| <i>Ulmus pumila</i>                 | -        | -              | √              | √            |
| <i>Bischofia polycarpa</i>          | -        | -              | √              | √            |

|                                                     |   |   |   |   |
|-----------------------------------------------------|---|---|---|---|
| <i>Cedrus deodara</i>                               | √ | - | - | √ |
| <i>Diospyros kaki</i>                               | - | √ | - | √ |
| <i>Juniperus chinensis 'Kaizuca'</i>                | √ | - | √ | √ |
| <i>Liquidambar formosana</i>                        | √ | - | √ |   |
| <i>Malus halliana</i>                               | √ | - | √ | √ |
| <i>Melia azedarach</i>                              | √ | - | √ | √ |
| <i>Pterocarya stenoptera</i>                        | √ | - | √ | √ |
| <i>Styphnolobium japonicum</i>                      | √ | √ | √ | √ |
| <i>Taxodium distichum</i> var.<br><i>imbricatum</i> | √ | - | - | - |
| <i>Toona sinensis</i>                               | √ | √ | √ | - |
| <i>Ulmus parvifolia</i>                             | √ | √ | √ | - |
